# Supplementary material for: Fracture behavior of highly toughened poly(lactic acid)/ethylene-co-vinyl acetate blends
Source: publisher site journal article supplement (doi:10.1515/epoly-2017-0114), 2017-09-05
Supplement: Supplementary file 1 [file epoly-2017-0114_suppl.doc]

Fracture behavior of highly toughened poly(lactic acid)/ethylene-co-vinyl acetate blends

Qingtao Zeng, Yongqi Feng, Ruyin Wang, Piming Ma

**Supporting Information**

Figure S1: Tan *δ* versus temperature curves of the PLA and PLA/EVM (80/20 wt/wt) blend obtained from the DMA characterization. The specimens (15 × 5.3 × 1.0 mm3) were heated in a tensile-film mode from -80 °C to 90 °C at 3 °C/min. The amplitude and frequency were set as 20 μm and 1 Hz, respectively.

Figure S2: DSC second heating curves of the PLA and PLA/EVM (80/20 wt/wt) blend. Samples were cooled to -50 ℃ at 10 ℃/min after heated at 170 ℃ for 3 min, then reheated to 170 ℃ at 10 ℃/min after held at -50 ℃ for 2 min.

Figure S3: WAXD profiles of the PLA and PLA/EVM (80/20 wt/wt) blend. Samples were obtained directly from the compression-molded sheets. The scan rate was set as 3°/min.
